# Supplementary material
Source: publisher site journal article supplement (https://www.dovepress.com/article/281649)
Supplement: Supplementary file 1 [file get_supplementary_file.php]

**Supporting information**

**Mitochondria-Targeting Oxygen-Sufficient Perfluorocarbon Nanoparticles for Imaging-Guided Tumor Phototherapy**

Sijie Chen, **a, b, c** Biying Huang, **a, b** Wenjing Pei, **a, b** Long Wang, **d** Yan Xu **a, b** and Chengcheng Niu **a, b,** *

**a** Department of Ultrasound Diagnosis, The Second Xiangya Hospital, Central South University, Changsha, Hunan 410011, China

**b**Research Center of Ultrasonography, The Second Xiangya Hospital, Central South University, Changsha, Hunan 410011, China

c Department of Ultrasound Diagnosis, Changsha Central Hospital, Nanhua University, Changsha, Hunan 410014, China

**d** Department of Orthopedics, Xiangya Hospital, Central South University, Changsha, Hunan 410008, China

**Keywords**

IR780, Mitochondria-targeting, Perfluorocarbon, Photodynamic therapy, Photothermal therapy

**Address all correspondence to:** Chengcheng Niu, Department of Ultrasound Diagnosis and Research Center of Ultrasonography, The Second Xiangya Hospital, Central South University, Changsha, Hunan, China, 410011; E-mail: [niuchengcheng@csu.edu.cn](mailto:niuchengcheng@csu.edu.cn)

**Supporting information 1. Appearance of IRP NPs (a) and IR NPs (b).**


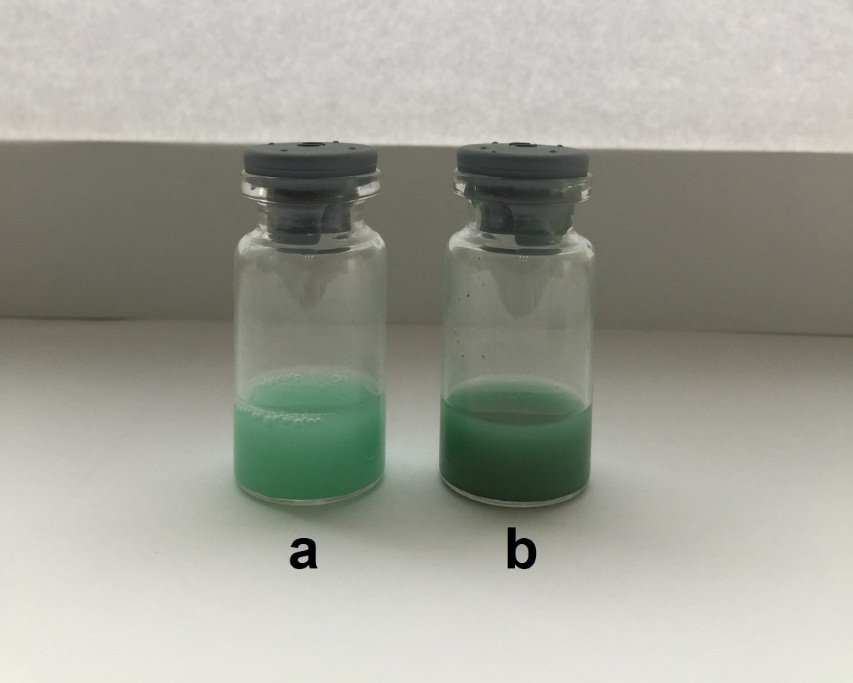


**Fig. S1**. Appearance of IRP NPs(a) and IR NPs (b).

**Supporting information 2. Molar absorption coefficient of IRP NPs**





**Fig. S2** Linear relationship between absorbance and concentration

**Supporting information 3. The photothermal conversion efficiency (η) of IRP NPs**

The photothermal conversion efficiency (η) of IRP NPs was calculated by the following equations (1-3):

η = [*hS*(*Tmax*- *Tsur*)-Q0]/[I(1-10-A)](1)

*hS* = *msCs*/τ (2)

t = -τ*ln(θ)* = -τ*ln*(*T*- *Tsur*)/(*Tmax*- *Tsur*) (3)

where *h* is the heat transfer coefficient, *S* is the surface area of the container, *Tmax* represents the equilibrium temperature, *Tsur* is the ambient temperature of the environment, Q0 expresses the heat dissipation from the light absorbed by the quartz sample cell (220 mW), I expresses the laser power density (2.0 W cm-2); A represents the absorbance of NPs at 808 nm; *ms* and *Cs* are the mass (1.0 g) and heat capacity (4.2 J g-1) of deionized water as a solvent, respectively; τ stands for the time constant of sample, which can be determined by the linear regression curve of temperature cooling time (t) vs –*ln(θ)* of NPs.


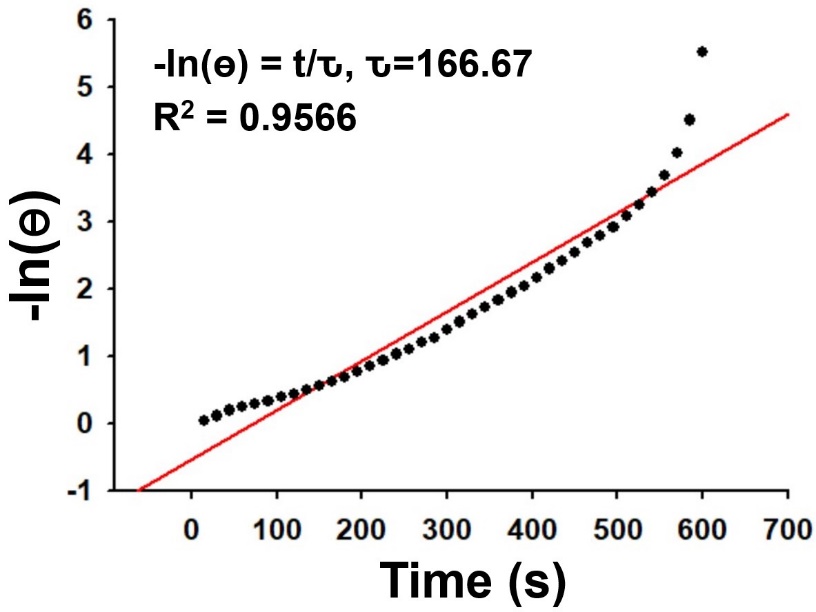


**Fig. S3** The linear regression curve of temperature cooling time (t) vs –ln(*θ*) of IRP NPs.

**Supporting information 4. Photodynamic measurement of IRP NPs**


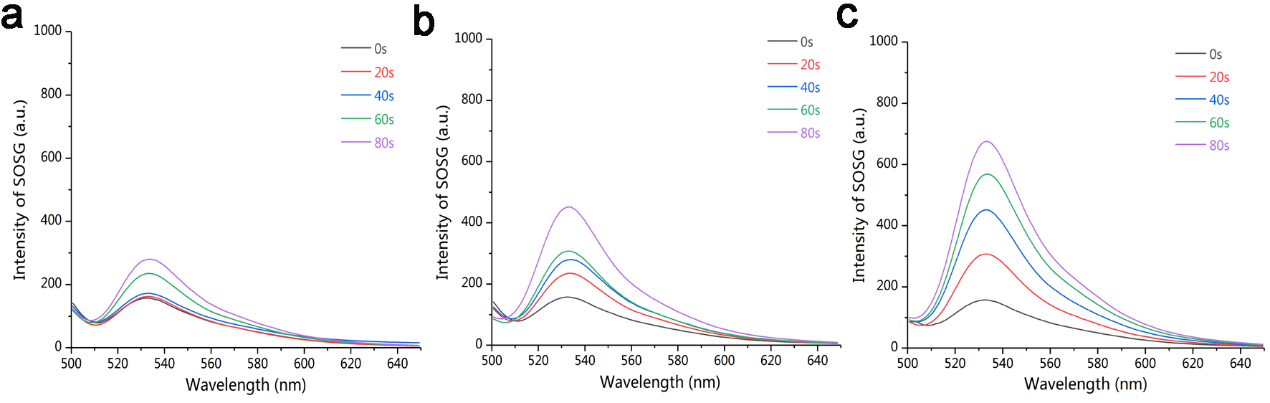


**Fig. S4** 1O2 generation from different concentration of IRP/O2 NPs using SOSG as a fluorescence probe with 808 nm laser irradiation (2 W cm-2). (a) 2.5 mg mL-1, (b) 5 mg mL-1, (c) 10 mg mL-1.

**Supporting information 5. 1O2 quantum yield measurement of IRP NPs**

Singlet oxygen quantum yield was calculated by ФΔ(X) = ФΔ(ICG)×(SX/SICG), in which the subscripts X and ICG represent IRP NPs and indocyanine green, respectively. S represents slope of absorbance plot of SOSG (525 nm) vs irradiation time.





**Fig. S5.** 1O2 generation from a plot of changes in absorbance by SOSG at 525 nm against different irradiation time (with 808 nm laser) in the presence of IRP NPs in water with ICG as a standard.

**Supporting information 6. The biocompatibility of IRP NPs**





**Fig. S6** Relative viability of 4T1 cells incubated with different concentrations of IR NPs and IRP NPs.

**Supporting information 7. FL/US imaging performance**

**
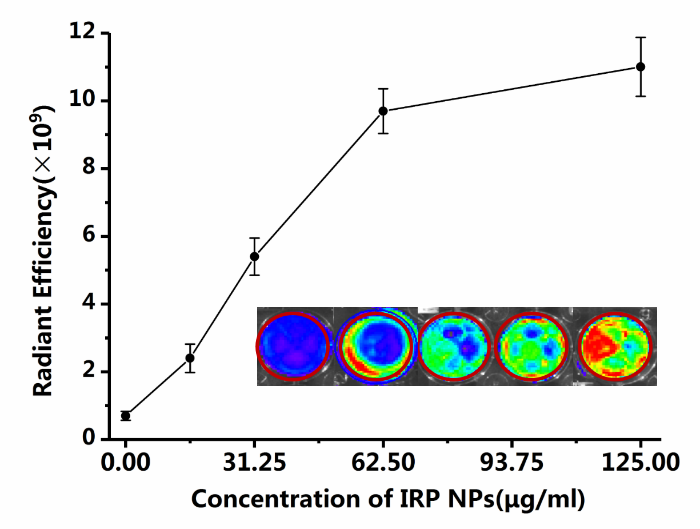
**

**Fig. S7** Fluorescence intensities and images with different concentration of IRP NPs.

**Supporting information 8**


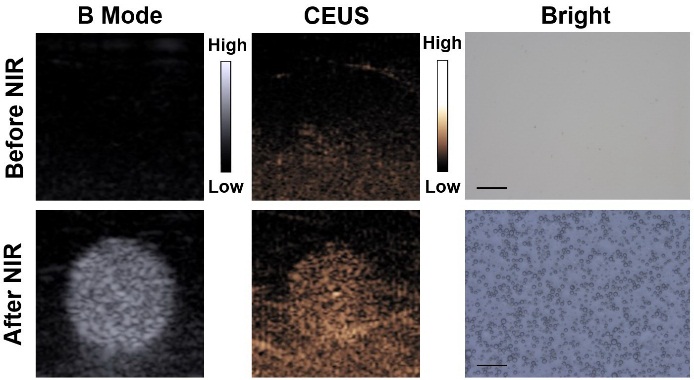


**Fig. S8** B mode and CEUS mode US images, and brightfield microscopy images of IRP NPs (30 mg mL-1) before and after NIR laser irradiation (808 nm, 1 W cm-2, 5 min), scale bar = 10 μm.

**Supporting information 9**


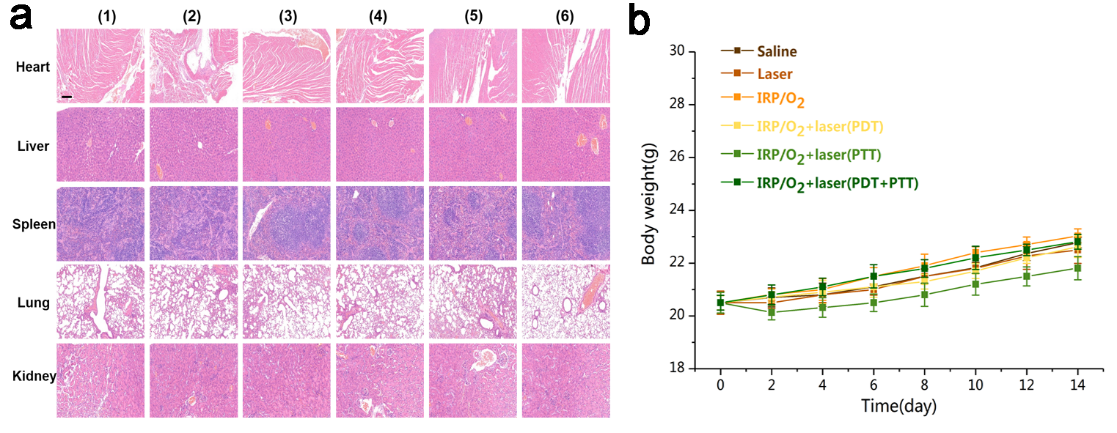


**Fig. S9** (a) H&E staining of heart, liver, spleen, lung, and kidney tissue slices after different treatments: (1) saline; (2) NIR; (3) IRP/O2 NPs; (4) IRP/O2 NPs with laser irradiation (PDT); (5) IRP/O2 with laser irradiation (PTT); and (6) IRP/O2 with laser irradiation (PDT+PTT) (scale bar, 50 μm). (b) Changes of mice body weight during different treatments.
